# Supplementary material for: Asiatic acid protects against hepatic ischemia/reperfusion injury by inactivation of Kupffer cells via PPARγ/NLRP3 inflammasome signaling pathway
Source: PubMed Central journal article supplement (PMC5689689; doi:10.18632/oncotarget.21151), 2017-09-21
Supplement: oncotarget-08-86339-s001.pdf [file oncotarget-08-86339-s001.pdf]

# Asiatic acid protects against hepatic ischemia/reperfusion injury by inactivation of Kupffer cells via PPAR $\gamma$ /NLRP3 inflammasome signaling pathway

## SUPPLEMENTARY MATERIALS

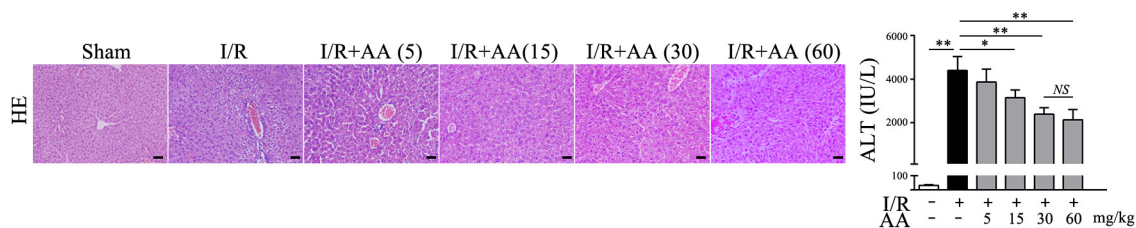

**Supplementary Figure 1: Preliminary study for the optimal dose of AA on hepatic I/R injury.** Male C57BL/6 mice were pretreated with either AA (5, 15, 30 and 60 mg/kg) or vehicle 1 h before hepatic I/R surgery. Representative histological staining of ischemic liver tissue and sALT were shown. Scale bar: 30 $\mu$ m. Results representative of 2-3 mice/group. \*, \*\* Significant difference ( $P < 0.05$ ,  $P < 0.01$ ) compared between the indicated groups. NS No significant difference ( $P > 0.05$ ) between the indicated groups.
